# Supplementary material
Source: publisher figshare collection journal article supplement (https://brill.figshare.com/articles/dataset/_/26097376)
Supplement: Supplementary file 3 [file 1]

Table 2 Contents of GA 250 and GA 424

| GA 250               |                                                                   | GA 424                                                                               |                    | Notes                                                                                                                                                                                                  |
|----------------------|-------------------------------------------------------------------|--------------------------------------------------------------------------------------|--------------------|--------------------------------------------------------------------------------------------------------------------------------------------------------------------------------------------------------|
| Folios               | Contents                                                          |                                                                                      | Folios             |                                                                                                                                                                                                        |
| 1r–8r                | Liturgica, Tabulae liturgicae                                     |                                                                                      | 1r–8r              |                                                                                                                                                                                                        |
|                      |                                                                   | ‡ Lexica, Glossarium in Act                                                          | 8r–9v <sup>2</sup> | <sup>2</sup> ερμηνεία εβραϊκών ονομάτων. των εν ταις Πράξεσι των αγίων αποστόλων εμφορομενων· κατά στοιχειον ηρμηνευμενη                                                                               |
|                      |                                                                   | ‡ Apocrypha, De nominibus prophetarum                                                | 9v <sup>2</sup>    | <sup>2</sup> ερμηνεία των προφητικών ονομάτων                                                                                                                                                          |
| 8v–12r               | Dorotheus Tyrius, Index apostolorum et discipulorum               |                                                                                      | 10r–12v*           | * The Dorothean material is formatted like a frame commentary; a portion ends on 12r and frame continues to 12v                                                                                        |
| 12r–12v              | Theologica, De baptisate apostolorum et Deiparae                  |                                                                                      | 12v                |                                                                                                                                                                                                        |
| 12v–13r              | Indices christiani rerum notabilium, Explanatio de uoce ανάστασις |                                                                                      | 12r–12v            |                                                                                                                                                                                                        |
| 13r–13v              | Indices christiani rerum notabilium, Explanatio de uoce φύσις     |                                                                                      | 12v–14r            |                                                                                                                                                                                                        |
| 13v <sup>1</sup>     | Liturgica, Preces quaedam                                         |                                                                                      | 13r <sup>2</sup>   | <sup>1,2</sup> ευλογία ην ευλογησεν Ιησου ο του Ναυη                                                                                                                                                   |
| 14r <sup>1</sup>     | Epiphanius Constantiensis, De mensuris et ponderibus              |                                                                                      | 13r <sup>2</sup>   | <sup>1,2</sup> ερμηνεία εβραϊκών λεξεων                                                                                                                                                                |
| 14r–14v              | Epiphanius Constantiensis, De XII gemmis                          |                                                                                      | 13r–14r            |                                                                                                                                                                                                        |
|                      |                                                                   | Recapitulationes, programmata et indices rerum biblicarum, Index librorum biblicorum | 14v <sup>2</sup>   | <sup>2</sup> A table of contents for the following New Testament books                                                                                                                                 |
|                      |                                                                   | Blank                                                                                | 15rv               |                                                                                                                                                                                                        |
|                      |                                                                   | Versus et epigrammata, Incipit "Λουκάς ηπιθυμος"                                     | 16r*               | * ParaTexBib incorrectly records this page with both DBBE 1990 and 2038. It is actually DBBE 4107. The decorative script here is unlike others throughout the manuscript and so is possibly secondary. |
| 14v–16v <sup>1</sup> | ‡ Lexica, Glossarium in Act.                                      |                                                                                      |                    | <sup>1</sup> ερμηνεία εβραϊκών ονομάτων· των εν ταις Πράξεσι των αποστόλων εμφορομενων· κατά στοιχειον ηρμηνευμενη                                                                                     |
| 16v* <sup>1</sup>    | ‡ Apocrypha, De nominibus prophetarum                             |                                                                                      |                    | <sup>1</sup> ερμηνεία των προφητικών ονομάτων<br>* incorrectly catalogued as "Lexica, Glossaria biblica uaria"                                                                                         |
| 17r <sup>1</sup>     | Blank                                                             |                                                                                      | 16v–17r            | <sup>1</sup> Text added by a later hand                                                                                                                                                                |

| GA 250           |                                                           | GA 424    |  | Notes                                                                     |
|------------------|-----------------------------------------------------------|-----------|--|---------------------------------------------------------------------------|
| Folios           | Contents                                                  | Folios    |  |                                                                           |
| 17v–18r          | Dorotheus Tyrius, Index apostolorum et discipulorum       |           |  |                                                                           |
| 18r–24v          | Apocrypha, De prophetarum uita et obitu, recensio anonyma |           |  |                                                                           |
| 25v <sup>1</sup> | [ Icon of Chrysostom ]                                    |           |  | <sup>1</sup> Labeled an image of Chrysostom but is Luke. Recto is blank   |
| 26*              | <i>missing</i>                                            |           |  | * Not missing; skipped in the modern foliation                            |
| 27v <sup>1</sup> | [ Icon of Luke ]                                          | 17v*      |  | <sup>1</sup> Recto is blank<br>* Not listed separately by ParaTexBib      |
| 28r–111r         | Acts                                                      | 18r–101r  |  | Ins: λουκᾶ πράξεις τῶν ἀποστόλων                                          |
|                  |                                                           |           |  | Sub: τέλος τῶν πράξεων                                                    |
| 111v             | Hypothesis of James                                       | 101v      |  | ὑπόθεσις τῆς πρὸς ἱακώβου ἐπιστολῆς                                       |
| 112r–119v        | James                                                     | 102r–109v |  | Ins: ἐπιστολὴ τοῦ ἁγίου Ἰακώβου καθολικῆ                                  |
|                  |                                                           |           |  | Sub: τέλος                                                                |
| 119v–120r        | Hypothesis of 1 Peter                                     | 109v–110r |  | ὑπόθεσις τῆς πέτρου ᾠ ἐπιστολῆς                                           |
| 120v–128r        | 1 Peter                                                   | 110v–118r |  | Ins: πέτρου ἐπιστολὴ ᾠ                                                    |
|                  |                                                           |           |  | Sub: τέλος                                                                |
| 128r–128v        | Hypothesis of 2 Peter                                     | 118r–118v |  | ὑπόθεσις τῆς πέτρου β̄ ἐπιστολῆς                                          |
| 129r–134r        | 2 Peter                                                   | 119r–124r |  | Ins: πέτρου ἐπιστολὴ β̄                                                   |
|                  |                                                           |           |  | Sub: none                                                                 |
| 134r–135r        | Hypothesis of 1 John                                      | 124r–125r |  | ὑπόθεσις τῆς ἰωάννου ᾠ ἐπιστολῆς                                          |
| 135v–144r        | 1 John                                                    | 125v–134r |  | Ins: ἰωάννου ἐπιστολὴ ᾠ                                                   |
|                  |                                                           |           |  | Sub: ἰωάννου εὐαγγελιστοῦ ἐπιστολὴ πρώτη · ἐγράφη ἀπὸ ἐφέσου · στίχων σοδ |
| 144v             | Hypothesis of 2 John                                      | 134v      |  | ὑπόθεσις τῆς ἰωάννου β̄ ἐπιστολῆς                                         |

| GA 250                             |                                  | GA 424                                                 |                                    | Notes                                                                                                                                                                                                                     |
|------------------------------------|----------------------------------|--------------------------------------------------------|------------------------------------|---------------------------------------------------------------------------------------------------------------------------------------------------------------------------------------------------------------------------|
| Folios                             | Contents                         |                                                        | Folios                             |                                                                                                                                                                                                                           |
| 145 <sup>rv</sup>                  | 2 John                           |                                                        | 135 <sup>rv</sup>                  | Ins: ἰωάννου ἐπιστολὴ καθολικὴ β̄<br>Sub: τοῦ ἁγίου ἰωάννου τοῦ ἀποστόλου ἐπιστολὴ β̄ · στίχων λ̄                                                                                                                         |
| 146 <sup>r</sup>                   | Hypothesis of 3 John             |                                                        | 136 <sup>r</sup>                   | ὑπόθεσις τῆς ἰωάννου γ̄ ἐπιστολῆς                                                                                                                                                                                         |
| 146 <sup>v</sup> –147 <sup>r</sup> | 3 John                           |                                                        | 136 <sup>v</sup> –137 <sup>r</sup> | Ins: ἐπιστολὴ ἰωάννου καθολικὴ γ̄<br>Sub: τέλος                                                                                                                                                                           |
| 147 <sup>v</sup>                   | Hypothesis of Jude               |                                                        | 137 <sup>v</sup>                   | ὑπόθεσις ἰούδα ἀποστόλου ἐπιστολῆς                                                                                                                                                                                        |
| 148 <sup>r</sup> –150 <sup>v</sup> | Jude                             |                                                        | 138 <sup>r</sup> –140 <sup>v</sup> | Ins: ἰούδα ἐπιστολὴ καθολικὴ<br>Sub: ἐπιστολὴ ἰούδα · στίχων ξη̄                                                                                                                                                          |
| 151 <sup>r</sup> –158 <sup>v</sup> | Prologue to the Pauline Epistles |                                                        | 141 <sup>r</sup> –148 <sup>v</sup> | πρόλογος προτασσόμενος τῆς βίβλου παύλου τοῦ ἀποστόλου                                                                                                                                                                    |
| 159 <sup>r</sup> –161 <sup>r</sup> | Hypothesis of Romans             |                                                        | 149 <sup>r</sup> –151 <sup>v</sup> | ὑπόθεσις τῆς πρὸς ῥωμαίους ἐπιστολῆς                                                                                                                                                                                      |
| 161 <sup>v</sup>                   | Blank                            | Recapitulatio lectionum,<br>capitulorum, testimoniorum | 151 <sup>v</sup>                   |                                                                                                                                                                                                                           |
| 162 <sup>r</sup> –193 <sup>r</sup> | Romans                           |                                                        | 152 <sup>r</sup> –183 <sup>r</sup> | Ins 250: ἐπιστολὴ τοῦ ἁγίου παύλου τοῦ ἀποστόλου πρὸς ῥωμαίους<br>Ins 424: πρὸς ῥωμαίους<br>Sub: αὕτη ἡ ἐπιστολὴ ἐγράφη ἀπὸ κορίνθου διὰ φοίβης τῆς διακόνου τῆς ἐν<br>κεγχρέαις ἐκκλησίας · στίχων λ̄κ                   |
| 193 <sup>v</sup> –194 <sup>r</sup> | Hypothesis of 1 Corinthians      |                                                        | 183 <sup>v</sup> –184 <sup>r</sup> | ὑπόθεσις τῆς πρὸς κορινθίους ᾱ ἐπιστολῆς                                                                                                                                                                                 |
| 194 <sup>v</sup> –221 <sup>r</sup> | 1 Corinthians                    |                                                        | 184 <sup>v</sup> –212 <sup>r</sup> | Ins: πρὸς κορινθίους ᾱ<br>Sub: πρὸς κορινθίους ᾱ · ἐγράφη ἀπὸ φιλίππου · διὰ στεφανᾶ · καὶ<br>φουρτουνάτου · καὶ ἀχαϊκοῦ · καὶ τιμοθέου · περὶ ἐχθρῶν δὲ · ἀναγνώσεις ε̄ ·<br>κεφάλαια θ̄ · μαρτυρίας ιζ̄ · στίχους ωο̄ |
| 221 <sup>v</sup> –222 <sup>r</sup> | Hypothesis of 2 Corinthians      |                                                        | 212 <sup>v</sup> –213 <sup>r</sup> | ὑπόθεσις · τρίτης μὲν ἐπιστολῆς τοῦ ἀποστόλου · δευτέρας δὲ πρὸς<br>κορινθίους                                                                                                                                            |
| 222 <sup>v</sup> –240 <sup>v</sup> | 2 Corinthians                    |                                                        | 213 <sup>v</sup> –232 <sup>v</sup> | Ins: πρὸς κορινθίους β̄                                                                                                                                                                                                   |

| GA 250      |                               | GA 424    |  | Notes                                                                                                                                                                                                                    |
|-------------|-------------------------------|-----------|--|--------------------------------------------------------------------------------------------------------------------------------------------------------------------------------------------------------------------------|
| Folios      | Contents                      | Folios    |  |                                                                                                                                                                                                                          |
|             |                               |           |  | Sub: πρὸς κορινθίους β̄ · ἐγράφη ἀπὸ φιλίππου · διὰ τίτου καὶ λουκά · στίχων φς̄ · ἀναγνώσεων δ̄ · κεφάλαιων ῑ · μαρτυριῶν ιᾱ                                                                                          |
| 241rv       | Hypothesis of Galatians       | 232v–233r |  | ὑπόθεσις τῆς πρὸς γαλάτας ἐπιστολῆς                                                                                                                                                                                      |
| 242r–251r   | Galatians                     | 233v–242v |  | Ins: πρὸς γαλάτας                                                                                                                                                                                                        |
|             |                               |           |  | Sub: πρὸς γαλάτας · ἐγράφη ἀπὸ ῥώμης · στίχων ςγ̄                                                                                                                                                                        |
| 251r–252r   | Hypothesis of Ephesians       | 242v–243r |  | ὑπόθεσις τῆς πρὸς ἐφεσίους ἐπιστολῆς                                                                                                                                                                                     |
| 252v–261v   | Ephesians                     | 243v–252r |  | Ins: πρὸς ἐφεσίους                                                                                                                                                                                                       |
|             |                               |           |  | Sub: ἐγράφη ἀπὸ ῥώμης διὰ τυχιχοῦ · ἀναγνώσεις β̄ · κεφάλαια ῑ · μαρτυρίας ζ̄ · στίχους τιβ̄                                                                                                                            |
| 262r–262v   | Hypothesis of Philipians      | 252r–252v |  | ὑπόθεσις τῆς πρὸς φιλιππησίους ἐπιστολῆς                                                                                                                                                                                 |
| 262v–269r   | Philipians                    | 253r–258v |  | Ins: πρὸς φιλιππησίους                                                                                                                                                                                                   |
|             |                               |           |  | Sub: ἐγράφη ἀπὸ ῥώμης διὰ ἐπαφροδίτου · ἀναγνώσεων ` · κεφάλαιων ζ̄ · στίχων ϸη̄                                                                                                                                         |
| 269r–269v   | Hypothesis of Colossians      | 258v–259r |  | ὑπόθεσις τῆς πρὸς κολασσαεῖς ἐπιστολῆς                                                                                                                                                                                   |
| 269ar–275r* | Colossians                    | 259r–264v |  | * The modern foliation of 250 has 269 followed by 269a                                                                                                                                                                   |
|             |                               |           |  | Ins: πρὸς κολασσαεῖς                                                                                                                                                                                                     |
|             |                               |           |  | Sub: τέλος πρὸς κολασσαεῖς · ἐγράφη ἀπὸ ῥώμης · διὰ τυχιχοῦ καὶ ὀνησίμου · λέγει δὲ τὴν ἐκ λαοδικέων περὶ τῆς πρὸς τιμόθεον ᾱ̄ ἐπιστολῆς · ὅτι ἀνάγνωτε ἐκείσε · εἰς λαοδίκειαν γὰρ ἐγράφη · ἢ πρὸς τιμόθεον β̄ ἐπιστολῇ |
| 275v–276r   | Hypothesis of 1 Thessalonians | 265r–265v |  | 250: ὑπόθεσις τῆς πρὸς θεσσαλονικεῖς ᾱ̄ ἐπιστολῆς                                                                                                                                                                        |
|             |                               |           |  | 424: ὑπόθεσις τῆς πρὸς θεσσαλονικεῖς πρώτης ἐπιστολῆς                                                                                                                                                                    |
| 276v–282r   | 1 Thessalonians               | 265v–270v |  | Ins: πρὸς θεσσαλονικεῖς ᾱ̄                                                                                                                                                                                               |
|             |                               |           |  | Sub: ἐγράφη ἀπὸ ἀθηνῶν · ἀναγνώσεων ᾱ̄ · κεφάλαιων ζ̄ · στίχων ργ̄                                                                                                                                                       |
| 282v–283r   | Hypothesis of 2 Thessalonians | 270v–271v |  | ὑπόθεσις τῆς πρὸς θεσσαλονικεῖς β̄ ἐπιστολῆς                                                                                                                                                                             |

| GA 250    |                         | GA 424    |                                                                                                                                                                                                                    | Notes |
|-----------|-------------------------|-----------|--------------------------------------------------------------------------------------------------------------------------------------------------------------------------------------------------------------------|-------|
| Folios    | Contents                | Folios    |                                                                                                                                                                                                                    |       |
| 283v–286v | 2 Thessalonians         | 271v–274r | Ins: πρὸς θεσσαλονικεῖς β̄                                                                                                                                                                                         |       |
|           |                         |           | Sub: πρὸς θεσσαλονικεῖς β̄ · ἐγράφη ἀπὸ ἀθηνῶν · ἀναγνώσεων ᾱ̄ · κεφάλαίων ς̄ · στίχων ρς̄                                                                                                                         |       |
| 286v–287r | Hypothesis of 1 Timothy | 274v–275r | ὑπόθεσις τῆς πρὸς τιμόθεον ᾱ̄ ἐπιστολῆς                                                                                                                                                                            |       |
| 287v–294v | 1 Timothy               | 275r–281v | Ins: πρὸς τιμόθεον ᾱ̄                                                                                                                                                                                              |       |
|           |                         |           | Sub: πρὸς τιμόθεον ᾱ̄ · ἐγράφη ἀπὸ λαοδικείας ἣτις ἐστὶ μητρόπολις φρυγίας τῆς πακατιανῆς · ἀναγνώσεων ᾱ̄ · κεφάλαίων ιη̄ · μαρτυριῶν β̄ · στίχων ϸᾱ̄                                                              |       |
| 294v–295r | Hypothesis of 2 Timothy | 281v–282r | ὑπόθεσις τῆς πρὸς τιμόθεον β̄ ἐπιστολῆς                                                                                                                                                                            |       |
| 295v–300v | 2 Timothy               | 282v–287r | Ins: πρὸς τιμόθεον β̄ ἐπιστολή                                                                                                                                                                                     |       |
|           |                         |           | Sub: πρὸς τιμόθεον β̄ τῆς ἐφεσίων ἐκκλησίας ἐπίσκοπον πρῶτον χειροτονηθέντα · ἐγράφη ἀπὸ ῥώμης · ὅτε ἐκ δευτέρου παρέστη παῦλος τῷ καίσαρι ῥωμαίων νέρω · ἀναγνώσεις ᾱ̄ · κεφάλαια θ̄ · μαρτυρίας ᾱ̄ · στίχων ροβ̄ |       |
| 300v–301v | Hypothesis of Titus     | 287r–287v | ὑπόθεσις τῆς πρὸς τίτον ἐπιστολῆς                                                                                                                                                                                  |       |
| 301v–304r | Titus                   | 287v–290r | Ins: πρὸς τίτον ἐπιστολή παύλου                                                                                                                                                                                    |       |
|           |                         |           | Sub: πρὸς τίτον τῆς κρητῶν ἐκκλησίας πρῶτον ἐπίσκοπον χειροτονηθέντα · ἐγράφη ἀπὸ νικοπόλεως τῆς μακεδονίας · ἀναγνώσεις ᾱ̄ · κεφάλαια ς̄ · μαρτυρίας ᾱ̄ · στίχων ϣζ̄                                              |       |
| 304v      | Hypothesis of Philemon  | 290v      | ὑπόθεσις τῆς πρὸς φιλήμονα ἐπιστολῆς                                                                                                                                                                               |       |
| 304v–306r | Philemon                | 290v–291v | Ins: πρὸς φιλήμονα                                                                                                                                                                                                 |       |
|           |                         |           | Sub: πρὸς φιλήμονα καὶ ἀπφίαν δεσπότας ὀνησίμου · καὶ πρὸς ἀρχιεπίσκον διάκονος τῆς ἐν κολασσαῖς ἐκκλησίας · ἐγράφη ἀπὸ ῥώμης διὰ ὀνησίμου οἰκέτου · ἀναγνώσεων ᾱ̄ · κεφάλαίων β̄ · στίχων λζ̄                     |       |
| 306r–308r | Hypothesis of Hebrews   | 292r–293r | ὑπόθεσις τῆς πρὸς ἑβραίους ἐπιστολῆς                                                                                                                                                                               |       |
| 308r–328v | Hebrews                 | 293v–312v | Ins: πρὸς ἑβραίους                                                                                                                                                                                                 |       |

| GA 250                 |                                                                          | GA 424                      |                        | Notes                                                                                                                                                                                                                                                    |
|------------------------|--------------------------------------------------------------------------|-----------------------------|------------------------|----------------------------------------------------------------------------------------------------------------------------------------------------------------------------------------------------------------------------------------------------------|
| Folios                 | Contents                                                                 |                             | Folios                 |                                                                                                                                                                                                                                                          |
|                        |                                                                          |                             |                        | Sub: πρὸς ἑβραίους · ἐγράφη ἀπὸ ἰταλίας διὰ τιμοθέου · ἀναγνώσεις γ̄ · κεφάλαια κβ̄ · μαρτυρίας λ̄ · στίχων ψγ̄                                                                                                                                          |
| 329r–330r <sup>1</sup> | Hagiographica, Iohannes theologus ap. (S.), Commentariolus de Apocalypsi |                             | 312v–313v <sup>2</sup> | <sup>1</sup> Margins: Andreas Caesariensis, Commentarius in Apocalypsin<br><sup>2</sup> Margins: Varia marginalia exegetica in Apocalypsin<br>Although labeled differently, they have the same marginal text.                                            |
| 330v–332v              | Prologi Librorum Biblicorum, In Apoc.: argumentum Œcumenii               |                             |                        |                                                                                                                                                                                                                                                          |
| 333v <sup>1</sup>      | [ Icon of Matthew ]                                                      |                             |                        | <sup>1</sup> Recto is blank                                                                                                                                                                                                                              |
| 334r–373v <sup>1</sup> | Revelation                                                               |                             | 314r–353v <sup>2</sup> | <sup>1,2</sup> Margins: Andreas Caesariensis, Commentarius in Apocalypsin                                                                                                                                                                                |
|                        |                                                                          |                             |                        | Ins: ἰωάννου τοῦ θεολόγου ἀποκάλυψις ἣν ἐν πάτμω τῇ νήσῳ ἐθεάσατο                                                                                                                                                                                        |
|                        |                                                                          |                             |                        | Sub: none                                                                                                                                                                                                                                                |
| 374r <sup>1</sup>      | Blank                                                                    |                             | 354r                   | <sup>1</sup> Text added by a later hand                                                                                                                                                                                                                  |
| 374v                   | Lexica, Glossarium hebraicorum nominum in Apoc.                          |                             | 354v                   |                                                                                                                                                                                                                                                          |
| 374v                   | Lexica, Glossarium gemmorum in Apoc.                                     |                             | 354v                   |                                                                                                                                                                                                                                                          |
|                        |                                                                          | Lexica, Varia               | 354v <sup>2</sup>      | <sup>2</sup> A note on the names in the epistle of Barnabas.                                                                                                                                                                                             |
| 375r–375v <sup>1</sup> | Lexica, Varia                                                            |                             | 355r–355v <sup>2</sup> | <sup>1,2</sup> Month names (Roman, Greek, Hebrew, Egyptian, Cappadocian, Athenian, Lacedemonian, Bithynian, Macedonian); Explication of Hebrew letters; Names of the archangels; Four rivers of Paradise                                                 |
| 376r–377v <sup>1</sup> | Nicephorus Cpl. ptr. I, Breuiarium                                       |                             | 356r–358v*             | <sup>1</sup> Index of episcopates and patriarchs<br>* Not subdivided in ParaTexBib; see below                                                                                                                                                            |
| **                     | Missing Page(s)                                                          | Chronologica, Index nominum | 359r–361v*             | * Not subdivided in ParaTexBib; see below<br>Bishops of Rome, Alexandria, Antioch, and Jerusalem; Hebrew fathers and high priests; Chaldean and Assyrian kings, Egyptian kings<br>** Pages missing between 377 and 388 in 250. See discussion in article |
| 378r–378v <sup>1</sup> | Chronologica, Index nominum                                              |                             | 362r–363v*             | <sup>1</sup> Index of emperors<br>* ParaTexBib lists 356r–363v as one unit for 424; it has been split to reflect agreements and disagreements with 250                                                                                                   |

| GA 250 |          | GA 424                                                      |                                 | Notes                                                 |
|--------|----------|-------------------------------------------------------------|---------------------------------|-------------------------------------------------------|
| Folios | Contents |                                                             | Folios                          |                                                       |
|        |          | [ Versus et epigrammata, Incipit "ἐν<br>πανερήμῳ σπεύδων" ] | 364r*                           | * Probably added by a later hand                      |
|        |          | Blank                                                       | 364v–366v,<br>368r <sup>2</sup> | <sup>2</sup> Chronologica, Varia added by later hands |
