# Supplementary material
Source: publisher figshare collection journal article supplement (https://brill.figshare.com/articles/dataset/_/26097376)

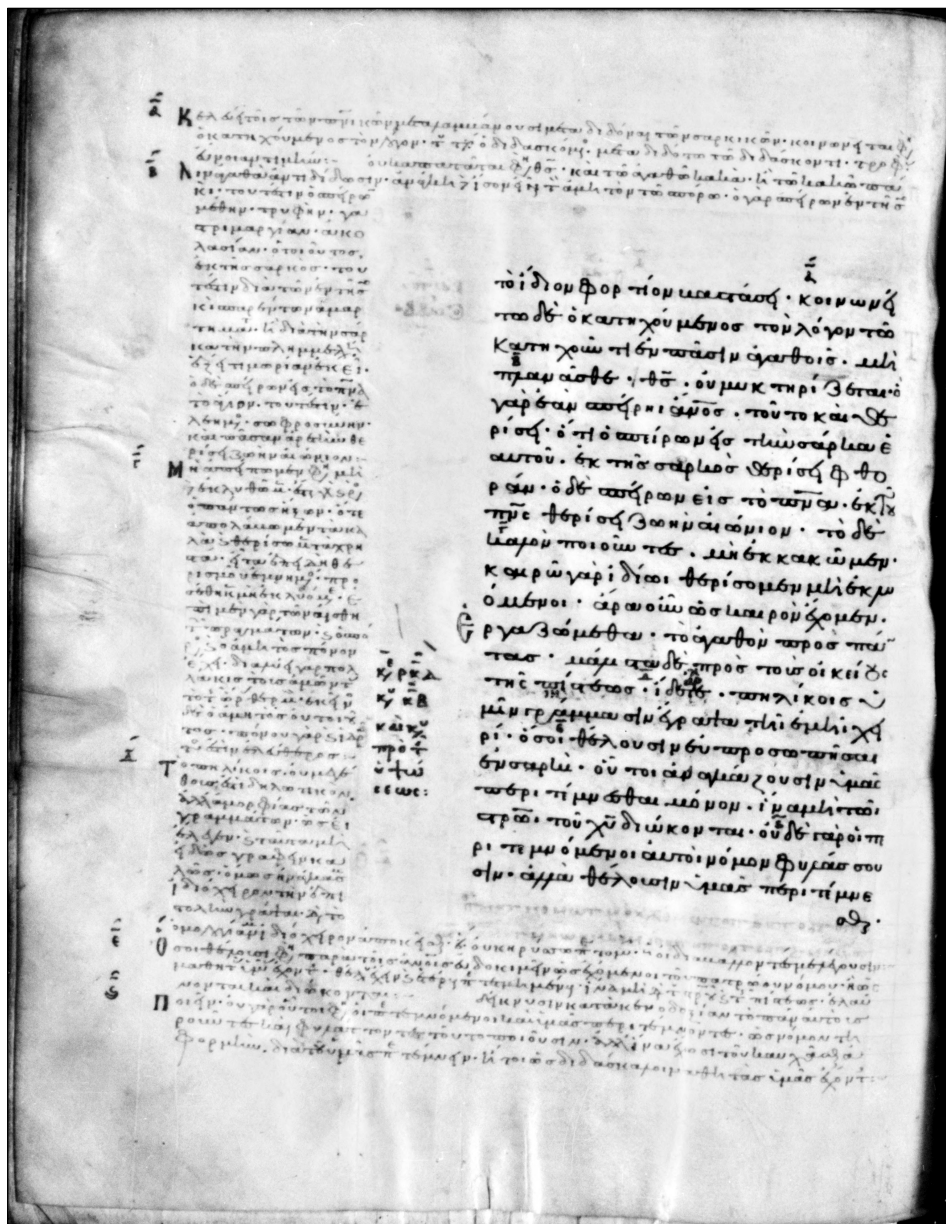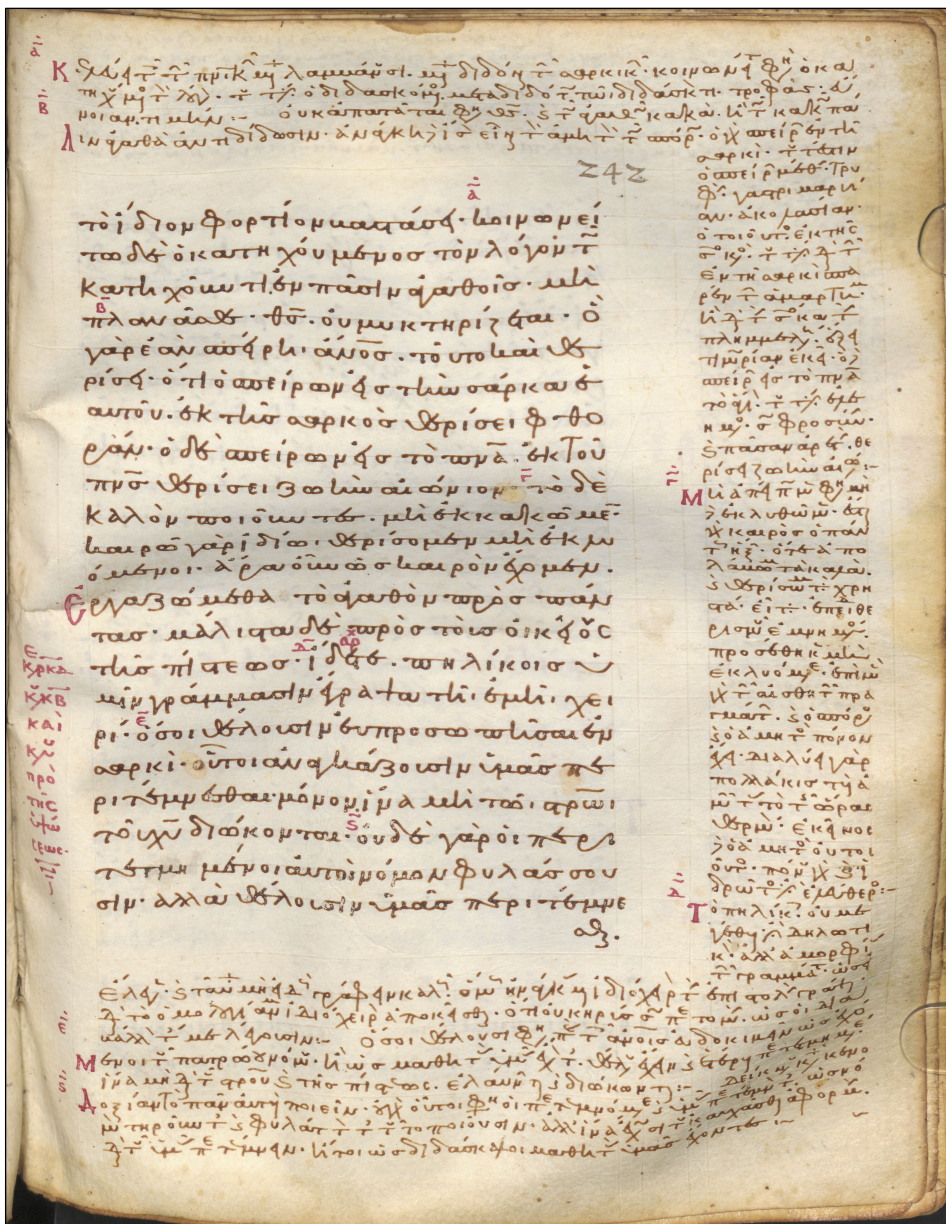

Figure 1 Gal 6:5–13 in GA 250 and GA 424 (Sources: gallica.bnf.fr / BnF and onb.digital/result/DTL\_7854932 / ÖNB)

Supplement: Supplementary file 1 [file 1]

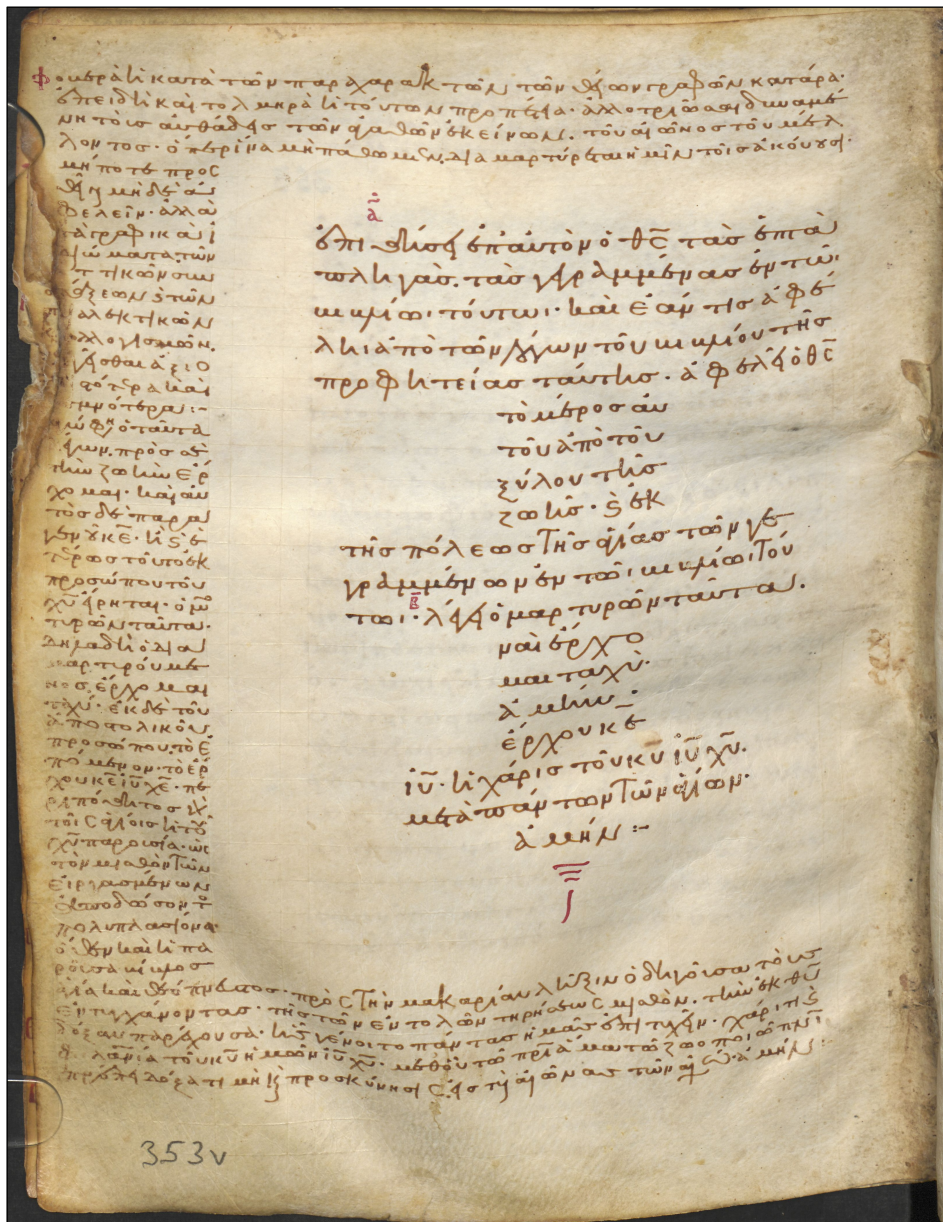

353v

Supplement: Supplementary file 2 [file 1]
